# Supplementary material
Source: Springer Nature journal article supplement (https://www.springermedizin.de/resource/supplementary/12931_2012_1336_MOESM10_ESM.pdf/9426062)

**CXCL10 concentration  
(fold-increase)**

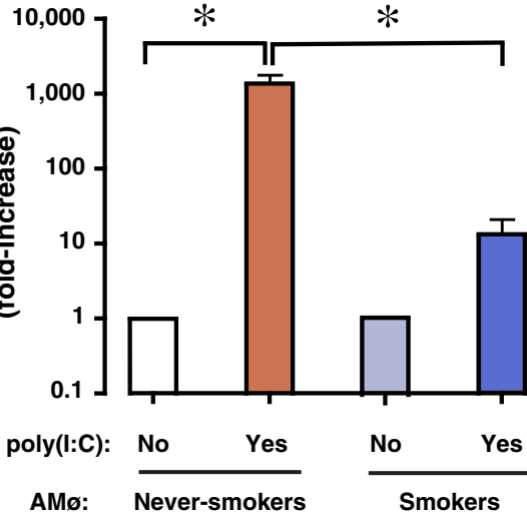

Supplement: MOESM10 [file 9426062]
